# Supplementary material for: Synthesis, characterization and chondrocyte culture of polyhedral oligomeric silsesquioxane (POSS)-containing hybrid hydrogels
Source: Royal Society of Chemistry journal article supplement (doi:10.1039/c5ra27989e), 2016-01-01
Supplement: c5ra27989e1.pdf [file c5ra27989e1.pdf]

## Supporting information

### **Synthesis, Characterization and Chondrocyte Culture of Polyhedral Oligomeric Silsesquioxane (POSS)-containing Hybrid Hydrogels**

Xiuwei Pan, Hao Gao, Guodong Fu, Yun Gao and Weian Zhang\*

*State Key Laboratory of Bioreactor Engineering; Shanghai Key Laboratory of Functional Materials Chemistry, East China University of Science and Technology, 130 Meilong Road, Shanghai 200237, China.*

\*Corresponding authors. Tel:+86 21 64253033

Email: wazhang@ecust.edu.cn

### **Synthesis of octa-chlorine-functionalized POSS (OCPOSS)**

OCPOSS was synthesized *via* the hydrolytic condensation of 3-chloropropyltrimethoxysilane as previously reported.<sup>1</sup> Briefly, 450 mL of methanol, 3-chloropropyltrimethoxysilane (19.88 g, 0.1 mol), and 22.5 mL of concentrated hydrochloric acid were mixed and stirred at room temperature for at least 5 weeks. OCPOSS was obtained as colorless crystals after filtrating, washing with methanol and deionized water, recrystallizing from acetone and drying in vacuo at 60 °C for 24 h (3.8 g, yield: 29.3%). <sup>1</sup>H NMR (400 MHz, CDCl<sub>3</sub>, δ): 0.75-0.88 (t, 2H, Si-CH<sub>2</sub>-), 1.80-1.96 (m, 2H, Si-CH<sub>2</sub>CH<sub>2</sub>-), 3.50-3.63 (t, 2H, Si-CH<sub>2</sub>-CH<sub>2</sub>-Cl).

### **Synthesis of octa-azido-functionalized POSS (OAPOSS)**

OAPOSS was synthesized *via* the substitution reaction between OCPOSS and sodium azide.<sup>2</sup> OCPOSS (1.0 g, 0.9 mmol), NaN<sub>3</sub> (1.3 g, 20 mmol), and DMF (30 mL) were mixed and stirred at 50 °C in a 100 mL round-bottom flask for 24 h. OAPOSS was obtained as colorless viscous liquid after precipitating in a large amount of deionized water and drying in vacuo at 50 °C for 48 h (2.8 g, yield: 88.6%). <sup>1</sup>H NMR (400 MHz, CDCl<sub>3</sub>, δ): 0.63-0.80 (t, 2H, Si-CH<sub>2</sub>-), 1.55-1.82 (m, 2H, Si-CH<sub>2</sub>CH<sub>2</sub>-), 3.23-3.40 (t, 2H, Si-CH<sub>2</sub>-CH<sub>2</sub>-N<sub>3</sub>).

### **Synthesis of alkyne-functionalized PEG**

Alkyne-functionalized PEG was synthesized *via* the reaction between PEG and propargyl bromide.<sup>3</sup> Briefly, sodium hydride (NaH) (0.2 g, 8 mmol) was

dissolved in 20 mL of anhydrous THF with vigorous stirring in a 250 mL round-bottom flask. PEG (1 mmol) in 50 mL THF solution was added dropwise to the flask with stirring at 0 °C. After stirring for 1 h, propargyl bromide (0.95 g, 8 mmol) diluted with 50 mL anhydrous THF was slowly dropped to the reaction mixture at 0 °C. The reaction was carried out for additional 24 h at room temperature. After reaction, the mixture was filtrated and thereafter the filtrate was extracted into dichloromethane to remove sodium bromide and excessive NaH. The organic layer was dried over MgSO<sub>4</sub>, concentrated *via* rotary evaporation and precipitated in diethyl ether. The product was further dried in vacuum at 30 °C for 48 h (yield: 90.8%). In a typical case of alkyne-functionalized PEG (6k), <sup>1</sup>H NMR (400 MHz, CDCl<sub>3</sub>, δ): 2.44 (s, 2H, HC≡C-), 4.22 (s, 4H, HC≡C-CH<sub>2</sub>-), 3.45-3.85 (m, 545H, -CH<sub>2</sub>CH<sub>2</sub>-O-). FTIR (cm<sup>-1</sup>, KBr): 3240 (≡C-H).

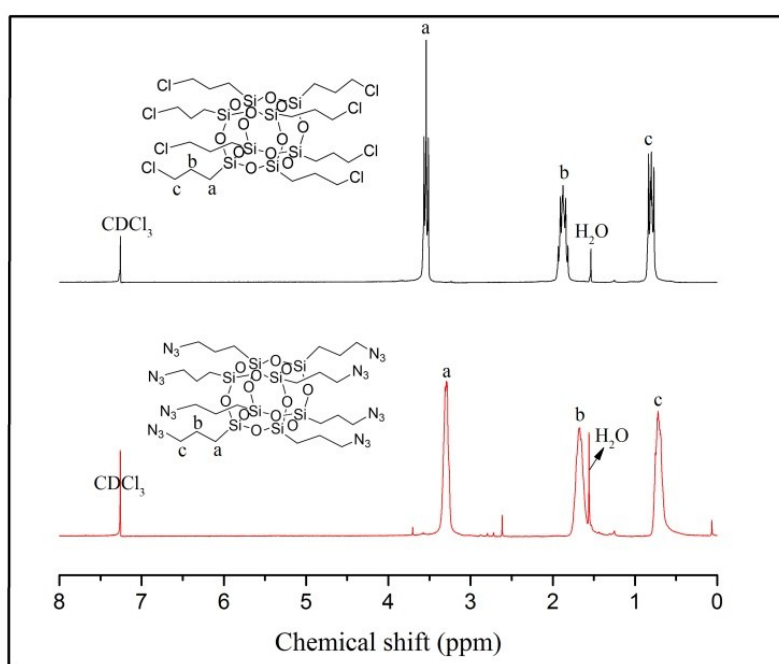

**Fig. S1.** <sup>1</sup>H-NMR spectra of OCPOSS and OAPOSS.

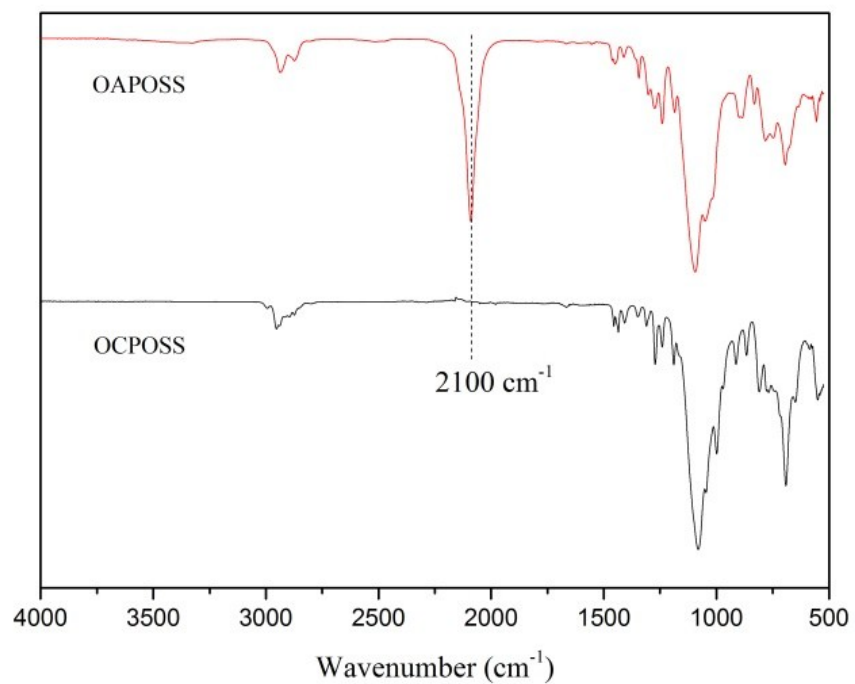

**Fig. S2.** FTIR spectra of OCPOSS and OAPOSS.

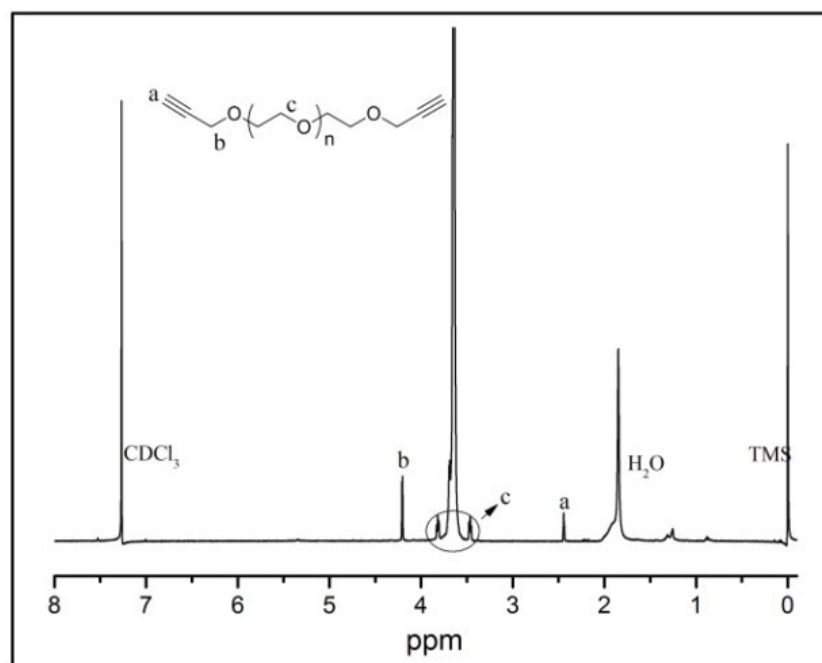

**Fig. S3.**  $^1\text{H}$ -NMR spectrum of alkyne-functionalized PEG (6k).

## References

1. Uwe Dittmar, Benedikt J. Hendan, Ulrich Flörke and H. C. Marsmann, *Journal of Organometallic Chemistry*, 1995, **489**, 185-194
2. Z. Ge, D. Wang, Y. Zhou, H. Liu and S. Liu, *Macromolecules*, 2009, **42**, 2903-2910.
3. C.-C. Lin, *RSC Adv.*, 2015, **5**, 39844-39853.
